# Supplementary figures and images for: High Tartronic Acid Content Germplasms Screening of Cucumber and Its Response to Exogenous Agents
Source: MDPI journal article supplement (doi:10.3390/foods13101484), 2024-05-10

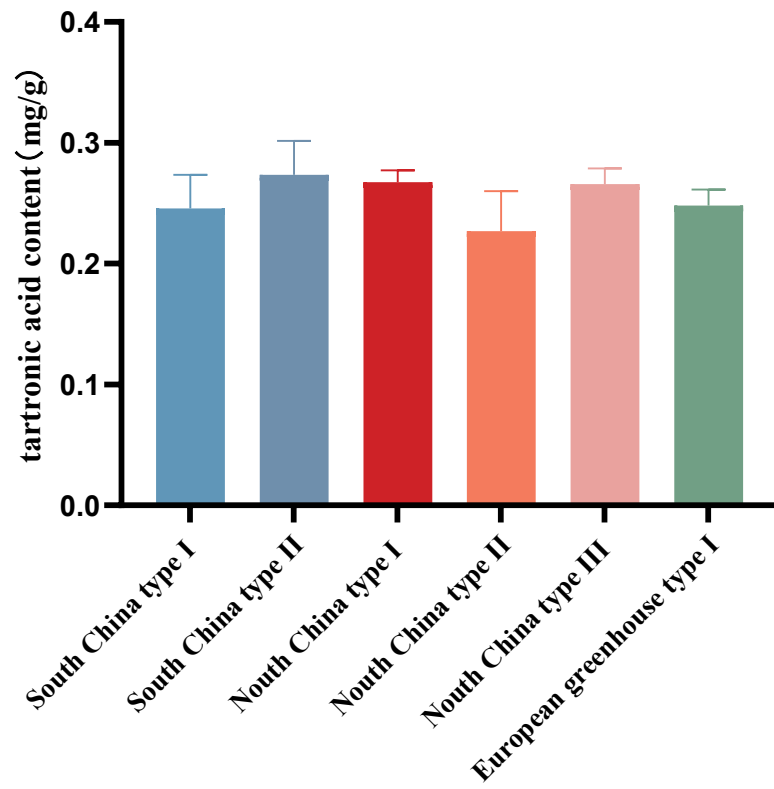

Figure S1. Tartronic acid content of existing commercially available cucumber varieties.

Supplement: s1 [file s1]
